# Supplementary material
Source: Royal Society of Chemistry journal article supplement (doi:10.1039/d6cc00978f)
Supplement: d6cc00978f1.pdf [file d6cc00978f1.pdf]

## Supplementary Information

### **Low-temperature topotactic conversion growth of porous $\text{CoFe}_2\text{O}_4$ nanocubes for advanced oxygen evolution reaction**

Linfeng Chen,<sup>a</sup> Zhenyuan Liu,<sup>\*a,b</sup> Zhiyong Han,<sup>a</sup> Yuxiu Shi,<sup>a</sup> Jiale He,<sup>a</sup> Haoyang Chen,<sup>a</sup> Qicheng Liu,<sup>c</sup> and Yawen Tang<sup>\*b</sup>

<sup>a</sup> School of Materials Science and Engineering, Jiangsu University of Science and Technology, Zhenjiang 212100, China. Email: zhenyuanliu@just.edu.cn (Z. Liu)

<sup>b</sup> Jiangsu Key Laboratory of New Power Batteries, Jiangsu Collaborative Innovation Centre of Biomedical Functional Materials, School of Chemistry and Materials Science, Nanjing Normal University, Nanjing 210023, China. E-mail: yawentang@njnu.edu.cn (Y. Tang)

<sup>c</sup> School of Food Science and Pharmaceutical Engineering, Nanjing Normal University, Nanjing 210023, China.

## **Experimental**

### **Chemical and materials**

Ferric chloride ( $\text{FeCl}_3$ ), potassium hexacyanocobaltate (III) ( $\text{K}_3\text{Co}(\text{CN})_6$ ) and commercial ruthenium dioxide ( $\text{RuO}_2$ ) were purchased from Aladdin Chemistry Co., Ltd (Shanghai, China). All materials were used without further purification. All the aqueous solutions were fixed with Millipore water at a resistivity of 18.2 M $\Omega$ .

### **Synthesis of porous $\text{CoFe}_2\text{O}_4$ nanocubes**

In a standard synthesis, 20 mL of 50 mM  $\text{FeCl}_3$  aqueous solution was mixed with 20 mL of 50 mM  $\text{K}_3\text{Co}(\text{CN})_6$  aqueous solutions under vigorous stirring for 5 min. Subsequently, the mixture was heated at 50 °C for 5 h and allowed to stand for 12 h to yield a pale yellow Fe-Co Prussian blue analogous (Fe-Co PBAs) precipitate. The precipitate was washed with ethanol and deionized water several times and separated by centrifugation at 9000 rpm for 5 min, and then dried at 40 °C for 12 h in a vacuum oven. The obtained dried Fe-Co PBAs were annealed at 320 °C for 1 h under air atmosphere with a heating rate of 1 °C min<sup>-1</sup>. After being cooled down to room temperature, the resulting black products were washed three times by centrifugation with distilled water and ethanol, and then dried at 40 °C to obtain porous spinel oxide  $\text{CoFe}_2\text{O}_4$  nanocubes ( $\text{CoFe}_2\text{O}_4$  NCs).

### **Physical characterization**

The morphology and structure of products were examined on JEOL JEM-2010 transmission electron microscope (TEM) and Hitachi S-4800 scanning electron microscopy (SEM). High-resolution transmission electron microscope (HRTEM), energy-dispersive X-ray (EDX), high-angle annular dark-field scanning transmission electron microscope (HAADF-STEM), and elemental mapping measurements were performed using FEI Tecnai G2 F20 microscope on the JEOL JEM-2100F. The Fourier transform infrared (FT-IR) spectra were recorded on a Nicolet 520 SXFTIR spectrometer. The phase purity and crystallinity of the products were identified by X-ray diffraction (XRD) on a Model D/max-rC X-ray diffractometer with Cu  $K\alpha$  radiation source ( $\lambda = 1.5406 \text{ \AA}$ ) at 40 kV and 100 mA. X-ray photoelectron spectroscopy (XPS) measurements were conducted using a Thermo VG Scientific ESCALAB 250

spectrometer equipped with a monochromatic Al K $\alpha$  X-ray source (1486.6 eV photons). All binding energies were calibrated against the C 1s at 284.6 eV. Thermogravimetric analysis (TGA) of the product was carried out with a Netzsch STA 449C thermal analyser at a heating rate of 10 °C min<sup>-1</sup> under air atmosphere.

### **Electrochemical measurements**

All electrochemical investigations were carried out using a CHI 760 E electrochemical workstation (CH Instruments, Chenhua Co., Shanghai, China) at 25 °C in a standard three-electrode configuration. The conventional three-electrode setup comprised a stone grinding rod auxiliary electrode, a saturated calomel electrode (SCE) as the reference electrode, and a working electrode consisting of a glassy carbon electrode coated with the catalysts. Cyclic voltammetry (CV) curve tests were obtained in N<sub>2</sub>-saturated 1 M KOH solution. The OER tests were carried out in O<sub>2</sub>-saturated 1 M KOH solution with a sweep rate of 5 mV s<sup>-1</sup>. The electrochemical double-layer capacitance ( $C_{dl}$ ) was determined using CV method within a non-Faradaic potential range (1.07-1.17 V) at different scan rates (40-200 mV s<sup>-1</sup>). The electrochemical impedance spectroscopy (EIS) was tested over a frequency range of 100 kHz-0.1 Hz. All potentials were calibrated to reversible hydrogen electrode (RHE) in this work.

## Figures and Tables

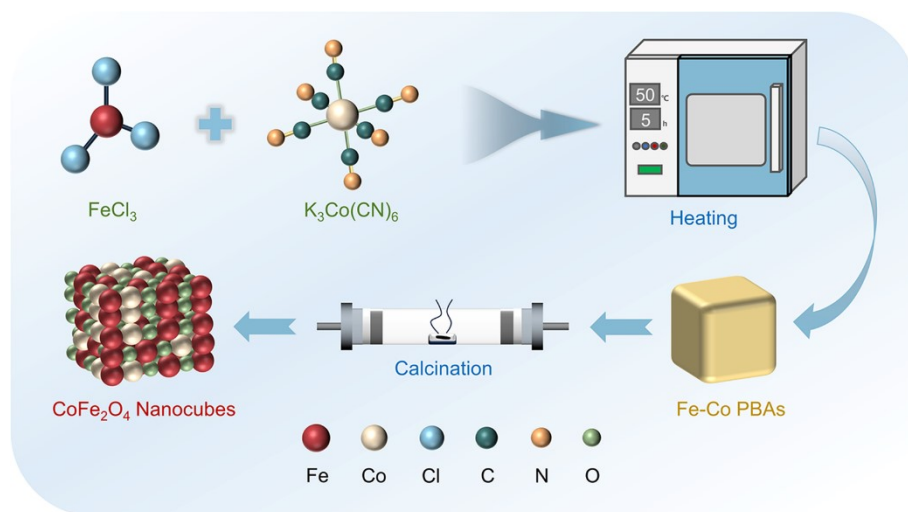

**Fig. S1** Schematic illustration of the preparation of porous  $\text{CoFe}_2\text{O}_4$  NCs.

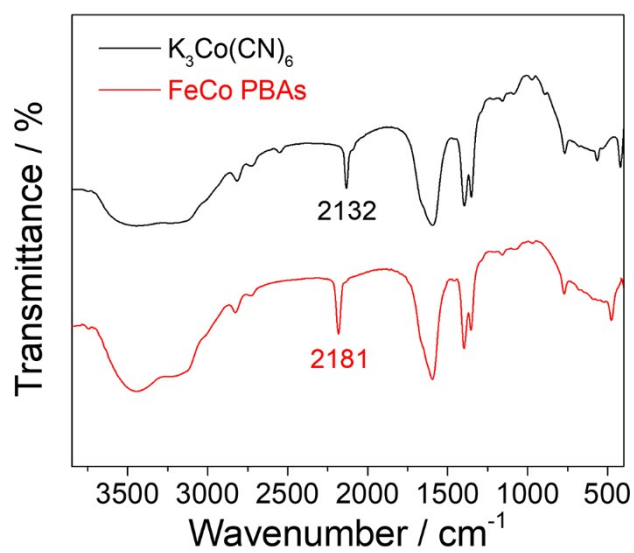

**Fig. S2** FTIR spectra of Fe-Co PBAs and  $\text{K}_3\text{Co}(\text{CN})_6$ .

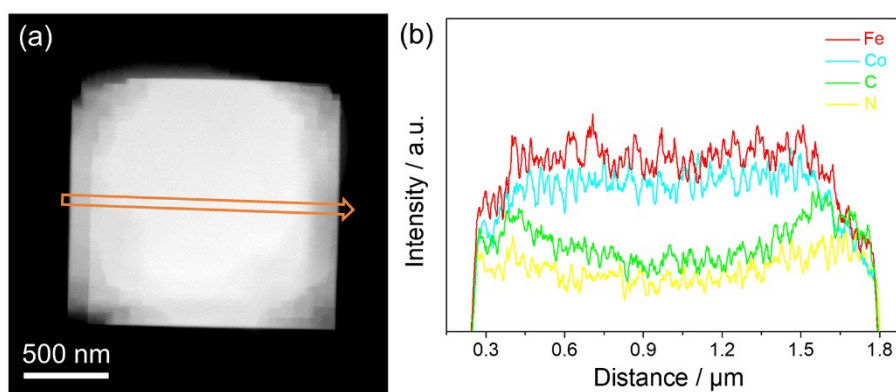

**Fig. S3** (a) HAADF-STEM image and (b) EDX line scanning profile of the Fe-Co PBAs.

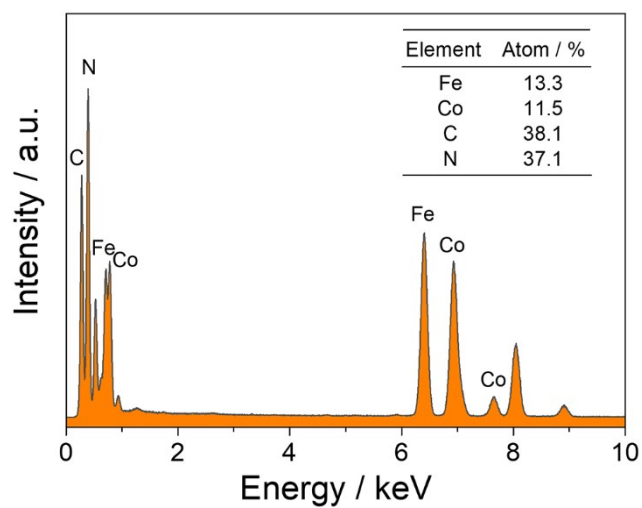

**Fig. S4** EDX analysis of the Fe-Co PBAs.

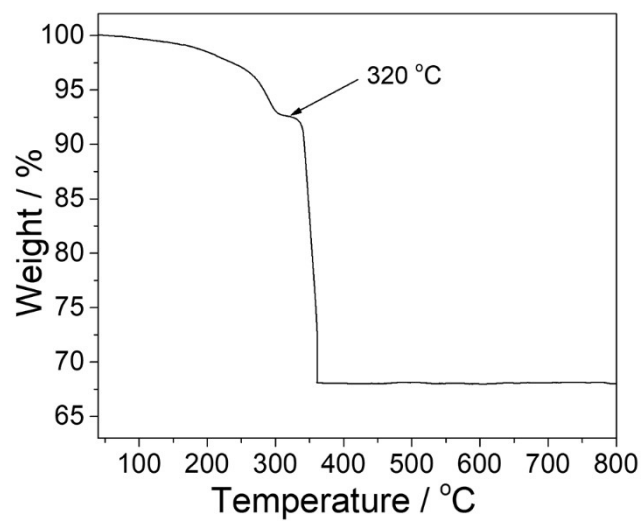

**Fig. S5** TGA analysis of the Fe-Co PBAs.

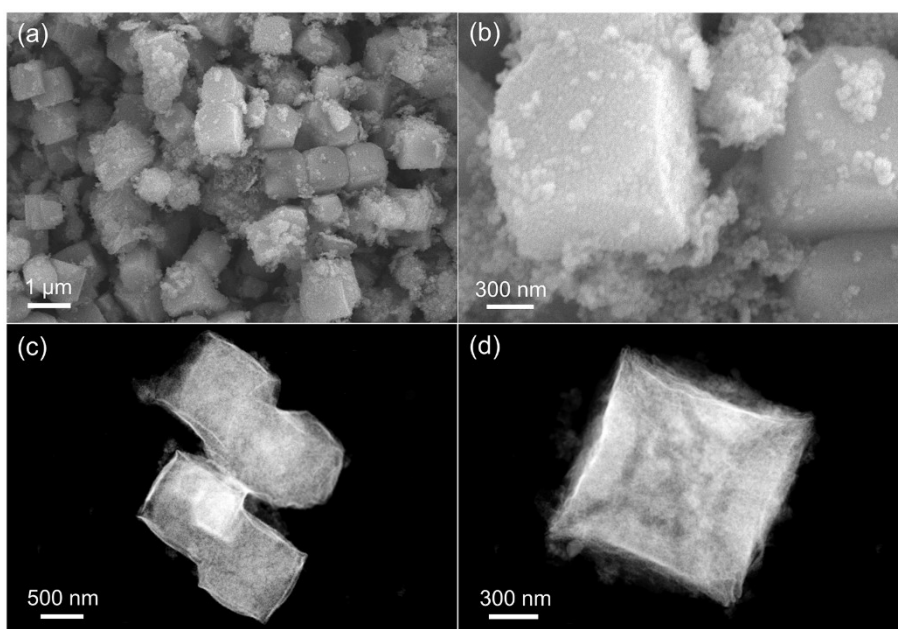

**Fig. S6** (a-b) SEM and (c-d) HAADF-STEM images of the porous  $\text{CoFe}_2\text{O}_4$  NCs.

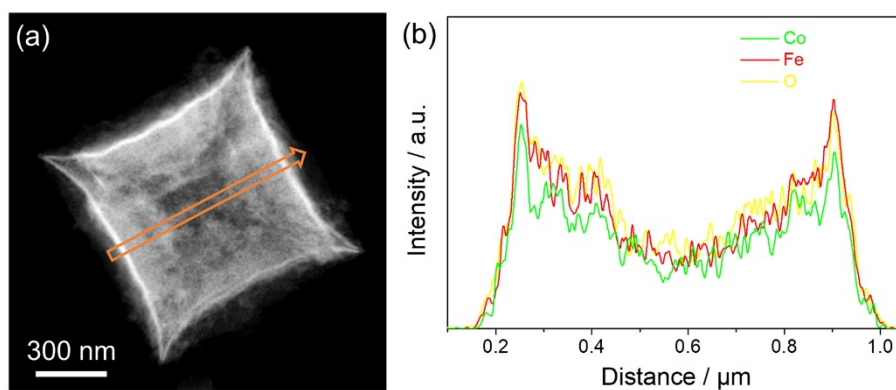

**Fig. S7** (a) HAADF-STEM image and (b) EDX line scanning profile of the porous  $\text{CoFe}_2\text{O}_4$  NCs.

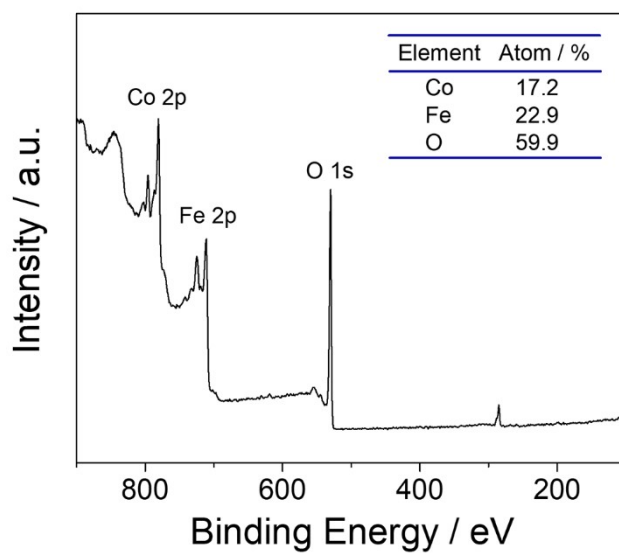

**Fig. S8** XPS survey scan spectrum of the porous  $\text{CoFe}_2\text{O}_4$  NCs.

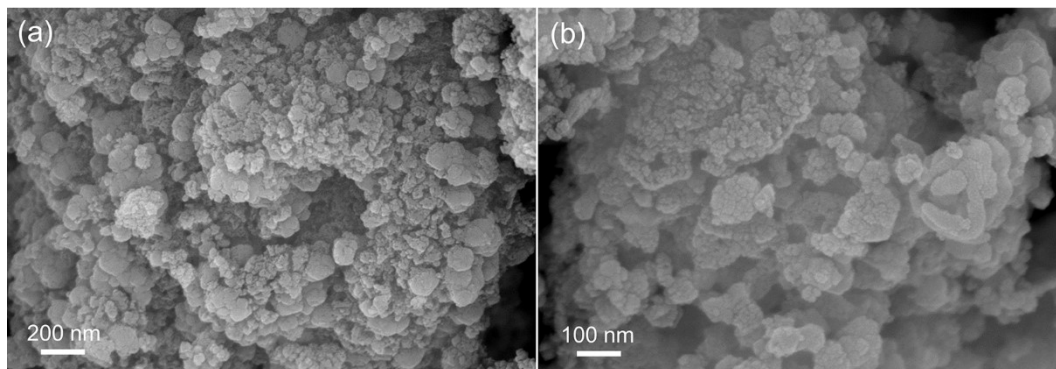

**Fig. S9** SEM images of non-porous  $\text{CoFe}_2\text{O}_4$ .

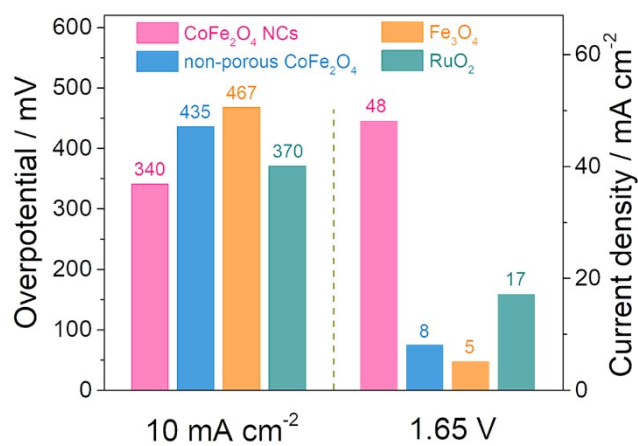

**Fig. S10** Comparisons of overpotentials at  $10 \text{ mA cm}^{-2}$  and current densities at  $1.65 \text{ V}$  (vs. RHE) of porous  $\text{CoFe}_2\text{O}_4$  NCs, non-porous  $\text{CoFe}_2\text{O}_4$ ,  $\text{Fe}_3\text{O}_4$ , and  $\text{RuO}_2$  catalysts.

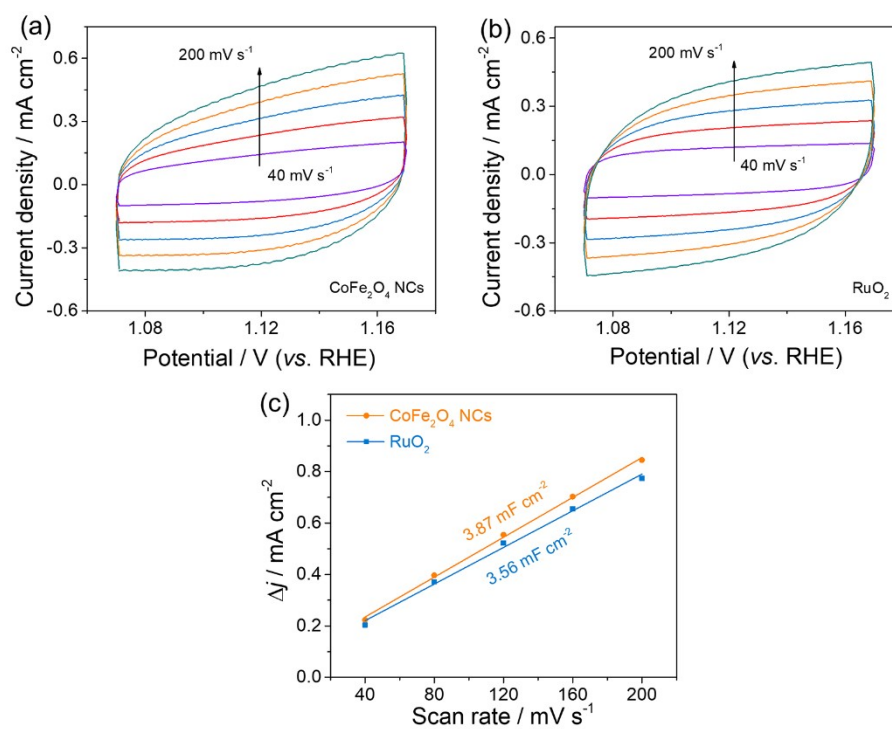

**Fig. S11** CV curves at different scan rates of (a) the porous CoFe<sub>2</sub>O<sub>4</sub> NCs and (b) RuO<sub>2</sub> catalysts. (c) C<sub>dl</sub> values of the porous CoFe<sub>2</sub>O<sub>4</sub> NCs and RuO<sub>2</sub> catalysts.

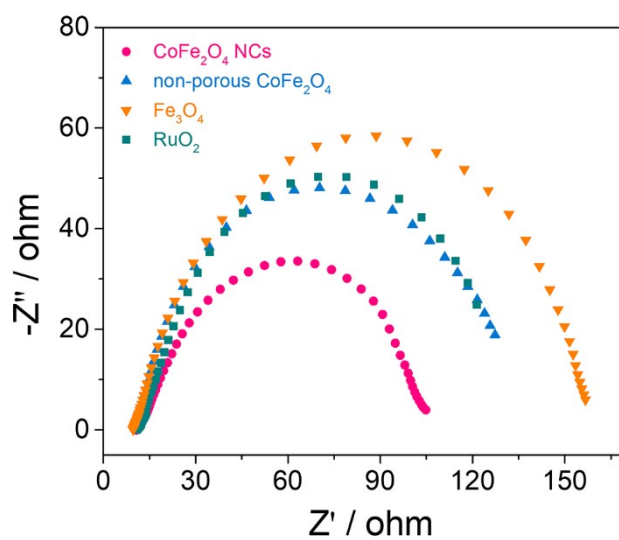

**Fig. S12** EIS Nyquist plots of the CoFe<sub>2</sub>O<sub>4</sub> NCs, non-porous CoFe<sub>2</sub>O<sub>4</sub>, Fe<sub>3</sub>O<sub>4</sub>, and RuO<sub>2</sub> catalysts.

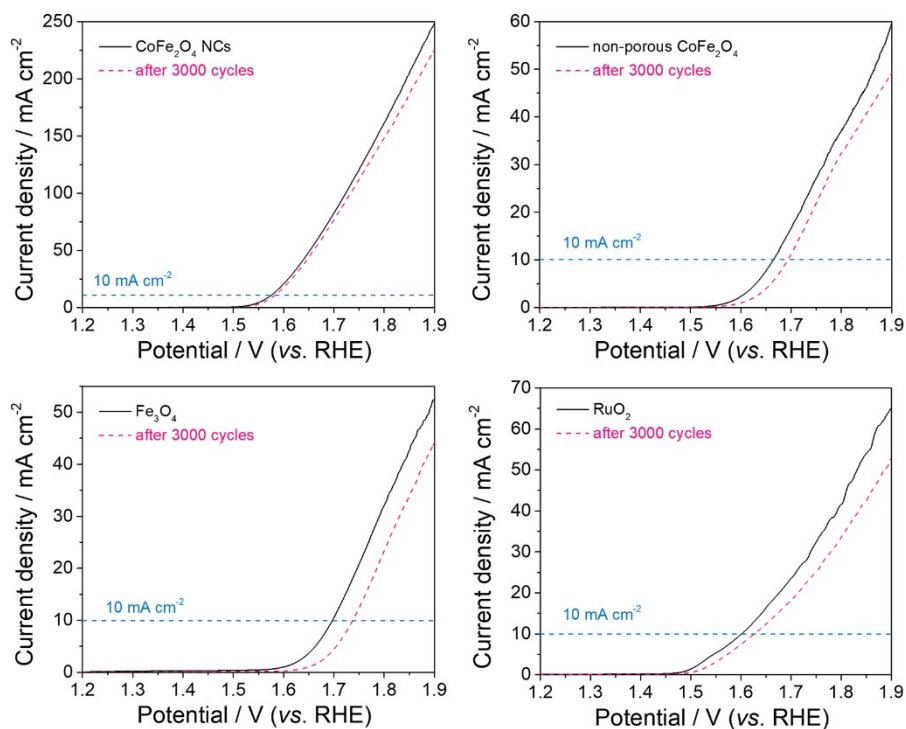

**Fig. S13** OER polarization curves of the CoFe<sub>2</sub>O<sub>4</sub> NCs, non-porous CoFe<sub>2</sub>O<sub>4</sub>, Fe<sub>3</sub>O<sub>4</sub>, and RuO<sub>2</sub> before and after 3000 cycles.

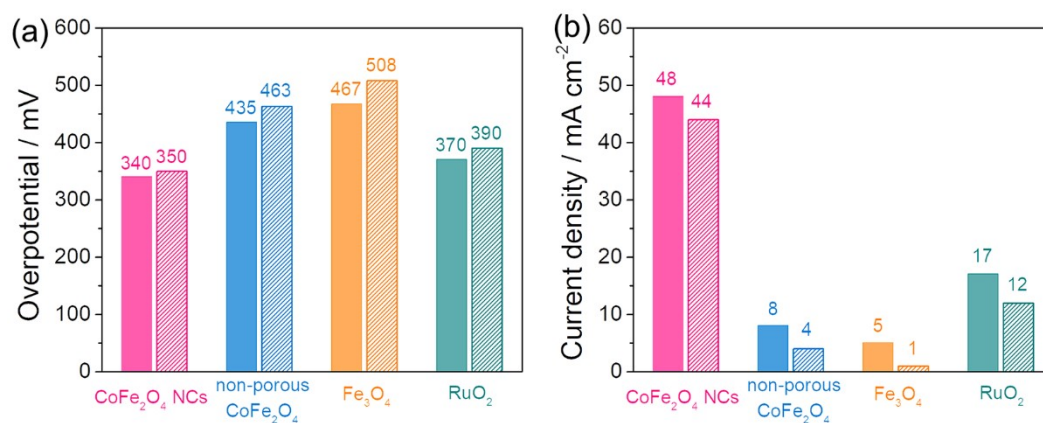

**Fig. S14** Comparisons of (a) overpotentials at 10 mA cm<sup>-2</sup> and (b) current densities at 1.65 V (vs. RHE) before and after 3000 cycles of porous CoFe<sub>2</sub>O<sub>4</sub> NCs, non-porous CoFe<sub>2</sub>O<sub>4</sub>, Fe<sub>3</sub>O<sub>4</sub>, and RuO<sub>2</sub> catalysts.

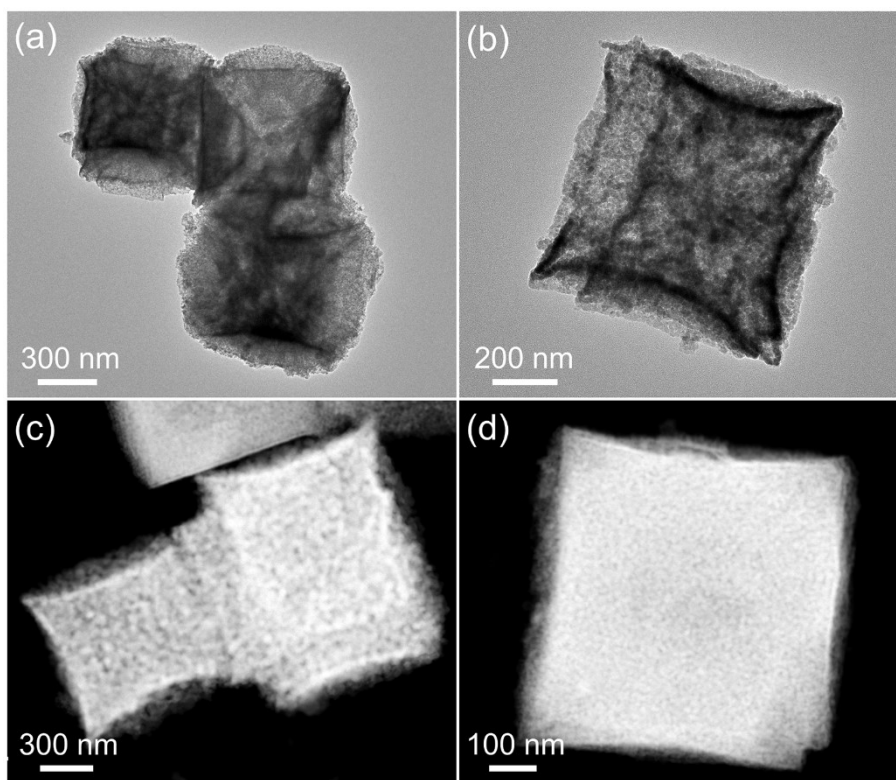

**Fig. S15** (a-b) HRTEM and (c-d) HAADF-STEM images of the porous  $\text{CoFe}_2\text{O}_4$  NCs after stability tests.

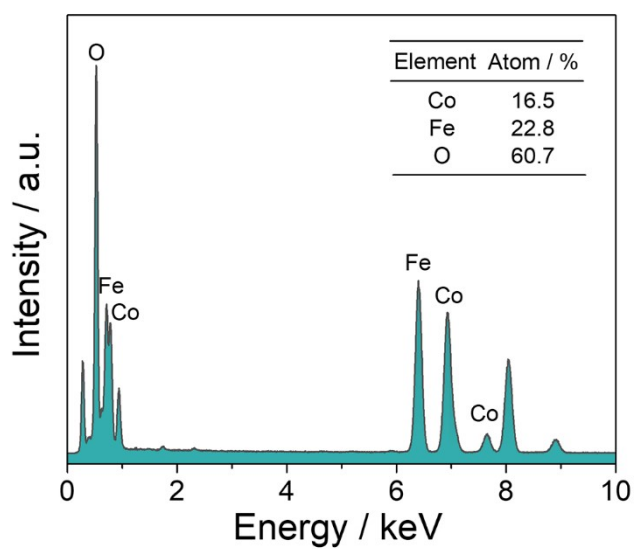

**Fig. S16** EDX analysis of the porous  $\text{CoFe}_2\text{O}_4$  NCs after stability tests.

**Table S1.** Comparison of the OER activity of porous CoFe<sub>2</sub>O<sub>4</sub> nanocubes with other reported catalysts in 1 M KOH.

| Catalyst                                                | Overpotential / mV<br>(10 mA cm <sup>-2</sup> ) | Tafel plots<br>/ mV dec <sup>-1</sup> | Ref.                                           |
|---------------------------------------------------------|-------------------------------------------------|---------------------------------------|------------------------------------------------|
| <b>CoFe<sub>2</sub>O<sub>4</sub> nanocubes</b>          | <b>340</b>                                      | <b>49.4</b>                           | <b>This work</b>                               |
| ZnCo <sub>2</sub> O <sub>4-x</sub> F <sub>x</sub> /CNTs | 350                                             | 59.2                                  | Angew. Chem. Int. Ed. 2023,<br>62, e202301408. |
| Co <sub>3</sub> O <sub>4</sub>                          | 350                                             | /                                     | Angew. Chem. Int. Ed. 2019,<br>58, 6042.       |
| FeCo@NG/NCNT                                            | 450                                             | 77                                    | New J. Chem. 2018, 42, 3409.                   |
| MoS <sub>2</sub> /Co-N-CN <sub>2</sub> -<br>900°C       | 442                                             | 169                                   | ACS Sustain. Chem. Eng.<br>2020, 8, 5724.      |
| FeNi/NC/gC <sub>3</sub> N <sub>4</sub> /NF              | 350                                             | 95                                    | Electrochim. Acta 2020, 331,<br>135375.        |
| NiCo <sub>2</sub> O <sub>4</sub> /MXene<br>Hybrid       | 360                                             | 64                                    | ChemCatChem 2024, 16,<br>e202301250.           |
| Co-doped NiO                                            | 450                                             | 89                                    | R. Soc. Open Sci. 2021, 8,<br>202352.          |
| P-NiCo <sub>2</sub> O <sub>4</sub>                      | 370                                             | 95                                    | Mater. Today Commun. 2022,<br>31, 103708.      |
| CoFe <sub>2</sub> O <sub>4</sub>                        | 359                                             | 53.8                                  | Electrochim. Acta 2021, 395,<br>139195.        |
| NiCo <sub>2</sub> O <sub>4</sub> /Ti                    | 353                                             | 61                                    | Int. J. Hydrog. Energy 2021,<br>46, 10259.     |
